# Supplementary material
Source: PubMed Central journal article supplement (PMC2873636)
Supplement: NIHMS201198-supplement-Supplemental.pdf [file NIHMS201198-supplement-Supplemental.pdf]

## Supplemental Data

### Defining the Glycan Destruction Signal for Endoplasmic Reticulum-Associated Degradation

Erin M. Quan, Yukiko Kamiya, Daiki Kamiya, Vladimir Denic, Jimena Weibezahn, Koichi Kato, and Jonathan S. Weissman

#### Supplemental Experimental Procedures

##### Plasmids

Yos9p without glycans (Figure 1A) was expressed from a CEN/ARS plasmid made by using QuikChange mutagenesis (Stratagene) to change N to Q in the four N-X-S/T sites in the coding region of a C-terminal 3FLAG-tagged Yos9p expressed from its endogenous promoter (Denic et al., 2006).

For cycloheximide degradation assays, CEN/ARS CPY\* and CPY\*0000 plasmids were constructed with ~700 base pairs of the endogenous *PRCI* promoter, signal sequence, and the CPY\* or CPY\*0000 (made from pES150, a gift from Davis Ng, National University of Singapore) gene. CPY\*/CPY\*0000 was tagged with 3HA between the end of the coding region and the *PRCI* terminator as previously described (Bhamidipati et al., 2005). KHN (pSM70) was a gift from Davis Ng, National University of Singapore. For Figure 1A p316-BIPss-CPY\*-3HA (Bhamidipati et al., 2005) was used.

C-terminally *HIS* tagged Yos9p was expressed in bacteria using pet23b-Yos9-6HIS (Figure 2B) constructed by amplifying the *YOS9* coding sequence without the signal sequence and inserting it into the *NdeI/XhoI* sites in pet23b. pet23b-Yos9 R200A-6HIS (Figure 2D) was made by subcloning the R200A mutation from pRS315-Yos9 R200A-FLAG3 (Denic et al.,

2006) into pet23b-Yos9-6HIS using *NcoI/PacI*. Pet23b-Yos9-8HIS (Figure 2C) was constructed by replacing the 6HIS with a GGS GGS linker and 8HIS tag.

All PCR derived inserts were checked by sequencing. The sequences of the plasmids are available upon request.

## Strains

*yos9Δ::MET* was constructed as previously described (Bhamidipati et al., 2005). *yos9Δ::MET* and BY4741 (S288C, *MATa his3Δ1 leu2Δ0 met15Δ0 ura3Δ0*) were transformed with CPY\* and either an empty vector or pRS315-YOS9-FLAG3 (Denic et al., 2006) with or without the glycosylation consensus sites to test whether the glycans on Yos9p are necessary for function (Figure 1A).

Strains for Figure 3 were made by crossing BY4741 with BY4742 (Brachmann et al., 1998) and subsequently deleting *ALG9* with the *Candida glabrata HIS3* prototrophic marker (Sakumoto et al., 1999), inserting the *TDH3* promoter in front of *ALG12* using a pFA6a-NATMX4-pTDH3 plasmid (a gift from D. Breslow, based on plasmids from (Longtine et al., 1998)) and deleting either *YOS9*, *DER1* or *HTM1* with the *Candida glabrata LEU2* gene using standard PCR-mediated methods at the genomic level. The diploid was then sporulated to obtain haploids that carried the desired combination of markers in the background of *Mat alpha his3Δ1 leu2Δ0 ura3Δ0 +/-lys2Δ0*. Strains for Figure S4 were made by taking the wild-type and single ERAD deletions from the above sporulation and deleting *ALG3* with the *Candida glabrata HIS3* prototrophic marker (Sakumoto et al., 1999). All strains altered by genomic insertions or deletions were checked by PCR.

## **Antibodies**

The HA epitope was detected using 12CA5 monoclonal antibody (Roche) or HA.11 (Covance). Anti-hexokinase antibody was purchased from US Biologicals. Secondary antibodies labeled with IR800 dye and Alex Fluor 680 were purchased from Rockland Immunochemicals and Molecular Probes, Inc, respectively.

## **Protein Purification**

Yos9p protein was expressed in Rosetta (DE3) pLysS cells (Novagen) from pet23b-Yos9-6HIS, Yos9-8HIS, or Yos9 R200A-6HIS. Expression was checked by Coomassie staining and Western analysis using an anti-His antibody (Santa Cruz Biotechnology). Cells were harvested, washed in 10mM Tris-HCL (pH 7.9), resuspended in 50mM Tris-HCL (pH7.9), 1mM EDTA, 150mM NaCl, protease inhibitors and lysed with 100µg/ml lysozyme on ice for 30 minutes plus sonication. Inclusion bodies were pelleted and washed twice with 50mM Tris-HCL (pH 7.9), 1mM EDTA, 2% Triton X-100, and protease inhibitors, and once with 50mM Tris-HCL (pH 7.9), 0.5mM EDTA, and protease inhibitors. The inclusion bodies were then dissolved in Buffer U (25mM Tris-HCL, 8mM 2-mercaptoethanol, 8M urea, protease inhibitors (pH 8.1)), incubate for 1hour and then centrifuged. The supernatant was filtered and bound in batch to Ni-NTA agarose (Qiagen). Bound protein was washed over a column with Buffer U with 0.8M NaCl, followed by a no salt wash and elution with 200mM Immidizole. Pooled fractions containing Yos9p were applied to a Source Q column and eluted using 25mM Tris-HCL, 10mM DTT, 1mM EDTA, 7M Urea, and a gradient of 0-400mM NaCL at pH 8.1. Fractions with protein were pooled, concentrated, and buffer exchanged using a PD-10 column (GE Healthcare) to remove DTT and EDTA. The protein was then refolded by dilution from 5mg/ml into 100mM Tris-HCL (pH 8.5)

150mM NaCl, 1mM CaCl<sub>2</sub>, 0.5M L-arginine, 5mM GSH, and 0.5mM GSSG at 4°C over the course of 1.5 hours for a final concentration of 100µg/ml (Lilie et al., 1998; Rudolph and Lilie, 1996). Refolding was monitored by running a SDS-PAGE gel of timepoints treated with 10mM 4-acetamido-4'-maleimidylstilbene-2,2'-disulfonic acid (AMS) or N-ethylmaleimide (NEM). After 24 hours, the protein was concentrated and diluted with 50mM Tris-HCL and 1mM CaCl<sub>2</sub> (pH 8.1) to lower the salt concentration before being applied to a Resource Q column (GE Healthcare) and eluted using 10mM HEPES, 1mM CaCl<sub>2</sub>, 10% glycerol, and a 0-400mM NaCl gradient at pH 7.4. Clean fractions were then combined, and buffer exchanged into 10mM HEPES, 1mM CaCl<sub>2</sub>, 10% glycerol, and 150mM NaCl (pH 7.4). Final protein was checked for presence of aggregates by gel filtration on a Superdex 200 10/300 GL column (GE Healthcare) and a non-reducing SDS-PAGE gel.

## Supplemental References

- Bhamidipati, A., Denic, V., Quan, E. M., and Weissman, J. S. (2005). Exploration of the topological requirements of ERAD identifies Yos9p as a lectin sensor of misfolded glycoproteins in the ER lumen. *Mol Cell* 19, 741-751.
- Brachmann, C. B., Davies, A., Cost, G. J., Caputo, E., Li, J., Hieter, P., and Boeke, J. D. (1998). Designer deletion strains derived from *Saccharomyces cerevisiae* S288C: a useful set of strains and plasmids for PCR-mediated gene disruption and other applications. *Yeast* 14, 115-132.
- Clerc, S., Hirsch C., Oggier D.M., Deprez P., Jakob C., Sommer T., Aebi M. (2009) Htm1 protein generates the N-glycan signal for glycoprotein degradation in the endoplasmic reticulum. *JCB In press*.
- Denic, V., Quan, E. M., and Weissman, J. S. (2006). A luminal surveillance complex that selects misfolded glycoproteins for ER-associated degradation. *Cell* 126, 349-359.
- Jakob, C. A., Burda, P., te Heesen, S., Aebi, M., and Roth, J. (1998). Genetic tailoring of N-linked oligosaccharides: the role of glucose residues in glycoprotein processing of *Saccharomyces cerevisiae* in vivo. *Glycobiology* 8, 155-164.
- Kamiya, Y., Kamiya, D., Yamamoto, K., Nyfeler, B., Hauri, H. P., and Kato, K. (2008). Molecular basis of sugar recognition by the human L-type lectins ERGIC-53, VIPL, and VIP36. *J Biol Chem* 283, 1857-1861.

Lilie, H., Schwarz, E., and Rudolph, R. (1998). Advances in refolding of proteins produced in *E. coli*. *Curr Opin Biotechnol* 9, 497-501.

Longtine, M. S., McKenzie, A., 3rd, Demarini, D. J., Shah, N. G., Wach, A., Brachat, A., Philippsen, P., and Pringle, J. R. (1998). Additional modules for versatile and economical PCR-based gene deletion and modification in *Saccharomyces cerevisiae*. *Yeast* 14, 953-961.

Rudolph, R., and Lilie, H. (1996). In vitro folding of inclusion body proteins. *Faseb J* 10, 49-56.

Sakumoto, N., Mukai, Y., Uchida, K., Kouchi, T., Kuwajima, J., Nakagawa, Y., Sugioka, S., Yamamoto, E., Furuyama, T., Mizubuchi, H., *et al.* (1999). A series of protein phosphatase gene disruptants in *Saccharomyces cerevisiae*. *Yeast* 15, 1669-1679.

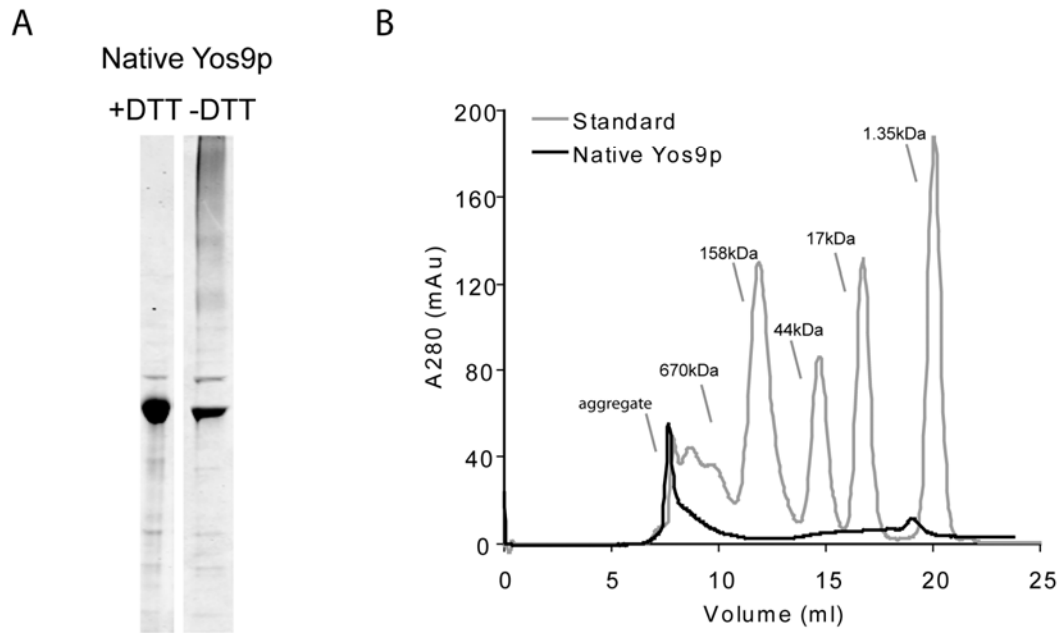

Figure S1. Native Yos9p forms disulfide-crosslinked aggregates

(A) Soluble Yos9p purified under non-denaturing conditions from *E. coli* was analyzed by SDS-PAGE with sample buffer containing either DTT or N-ethylmaleimide (-DTT).

(B) Elution profile for Yos9p purified natively from *E. coli* (black) and standards (gray) run on a gel filtration column in 20mM Tris-HCl (7.9), 150mM NaCl, 10% glycerol, 5mM GSH, and 1mM EDTA.

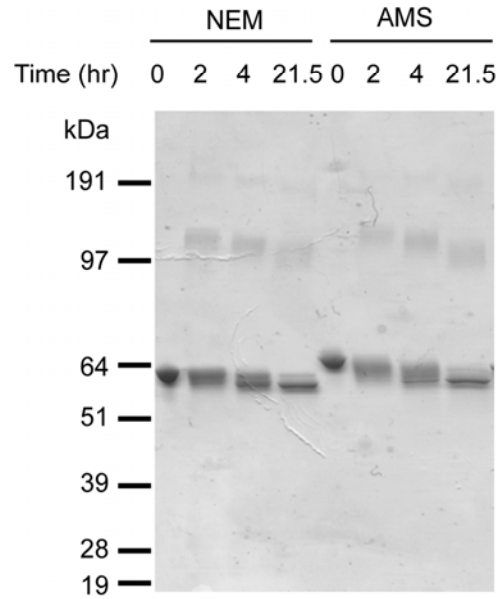

Figures S2. Refolding process of denatured Yos9p

Refolding of denatured Yos9p. To block free cysteines, 4-acetamido-4'-maleimidylstilbene-2,2'-disulfonic acid (AMS) or N-ethylmaleimide (NEM) were added to protein samples taken over time, resolved by SDS-PAGE and Coomassie stained. Note the time dependent shift of the protein. The protein was further purified to remove the higher molecular weight oligomers.

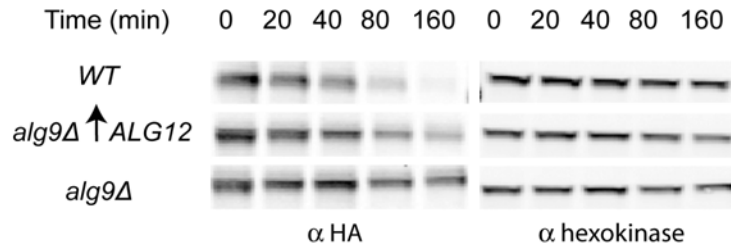

Figure S3. Production of  $\text{Man}_7\text{GlcNAc}_2$  sugars results in degradation of CPY\*  
Degradation of CPY\* in the indicated strain backgrounds were monitored and processed as in Figure 3B. A representative western blot is shown. Quantitation of the experiment is shown in Figure 3B.



**Further Evidence that an exposed  $\alpha$ 1,6-linked mannose allows for Htm1p-independent ERAD of misfolded glycoproteins.**

We tested a second ERAD-L glycoprotein substrate, KHN, to see if like CPY\*, the Htm1p dependence could be bypassed by genetic manipulations that produced sugars containing an exposed  $\alpha$ 1,6-linked mannose. Because of the limited dynamic range of the *alg9 $\Delta$ /ALG12* over-expression system, we used an *alg3 $\Delta$*  to produce Man5.2 sugars with a terminal  $\alpha$ 1,6-linked mannose (Figure S4A)(Jakob et al., 1998). In agreement with observations from Aebi and coworkers (Clerc et al., 2009), we find that the loss of *ALG3* removes the requirement for Htm1p for the degradation of CPY\* (Clerc et al. [2009] and Figure S4B). Similarly, we find that deletion of *ALG3*, eliminates the need for Htm1p in the degradation of KHN (Figure S4C). This is consistent with the hypothesis that a terminal  $\alpha$ 1,6-linked mannose is sufficient to allow for productive recognition by Yos9p although we have not directly tested Yos9p's ability to bind to M5.2 *in vitro*.

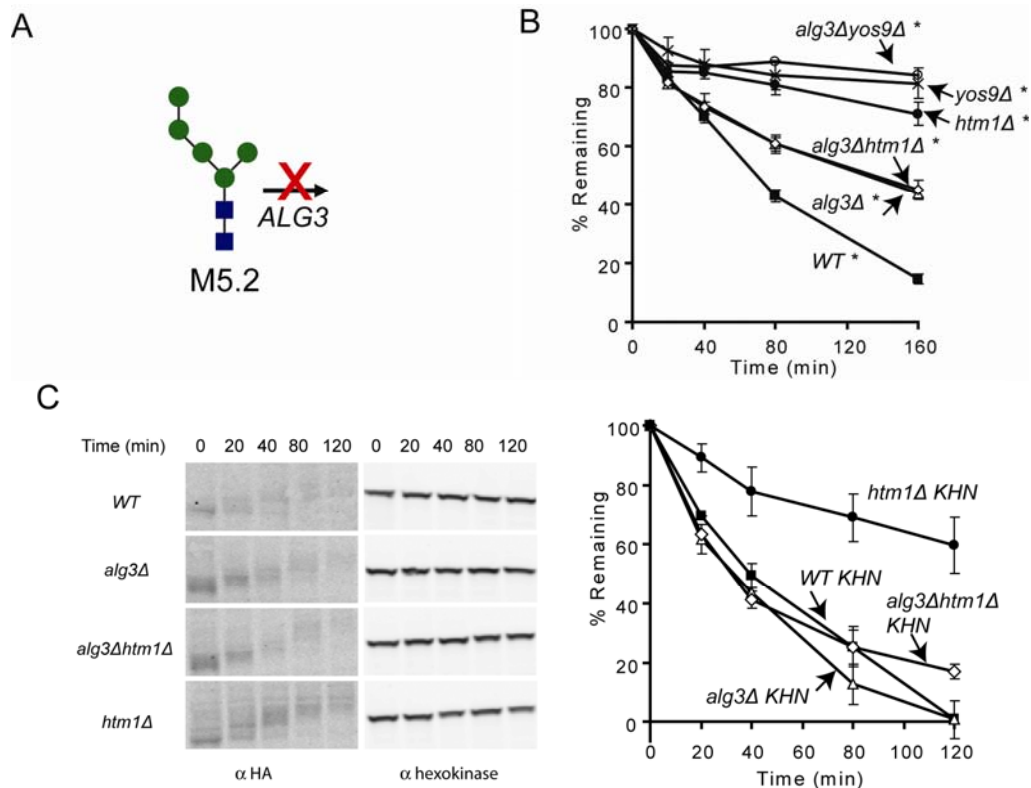

Figure S4. An exposed  $\alpha$ 1,6-linked mannose on CPY\* or KHN results in bypass of *HTM1* (A) A schematic representation of M5.2, a probably non-natural sugar produced by an *alg3 $\Delta$*  strain. Mannose residues are represented as green circles and N-acetylglucosamine is represented by blue squares.

(B) Degradation of CPY\* (depicted as a \*) in (■) wild-type (WT), (△) *alg3 $\Delta$* , (◇) *htm1 $\Delta$ alg3 $\Delta$*  and (●) *htm1 $\Delta$*  cells, (○) *yos9 $\Delta$ alg3 $\Delta$*  and (×) *yos9 $\Delta$*  cells was monitored and processed as in Figure 1A.

(C) Degradation of KHN in (■) wild-type (WT), (△) *alg3 $\Delta$* , (◇) *htm1 $\Delta$ alg3 $\Delta$*  and (●) *htm1 $\Delta$*  cells was monitored and processed as in Figure 3B. Representative gel shown (left).
